# Supplementary material
Source: Springer Nature journal article supplement (https://www.springermedizin.de/resource/supplementary/12872_2004_43_MOESM8_ESM.pdf/9430940)

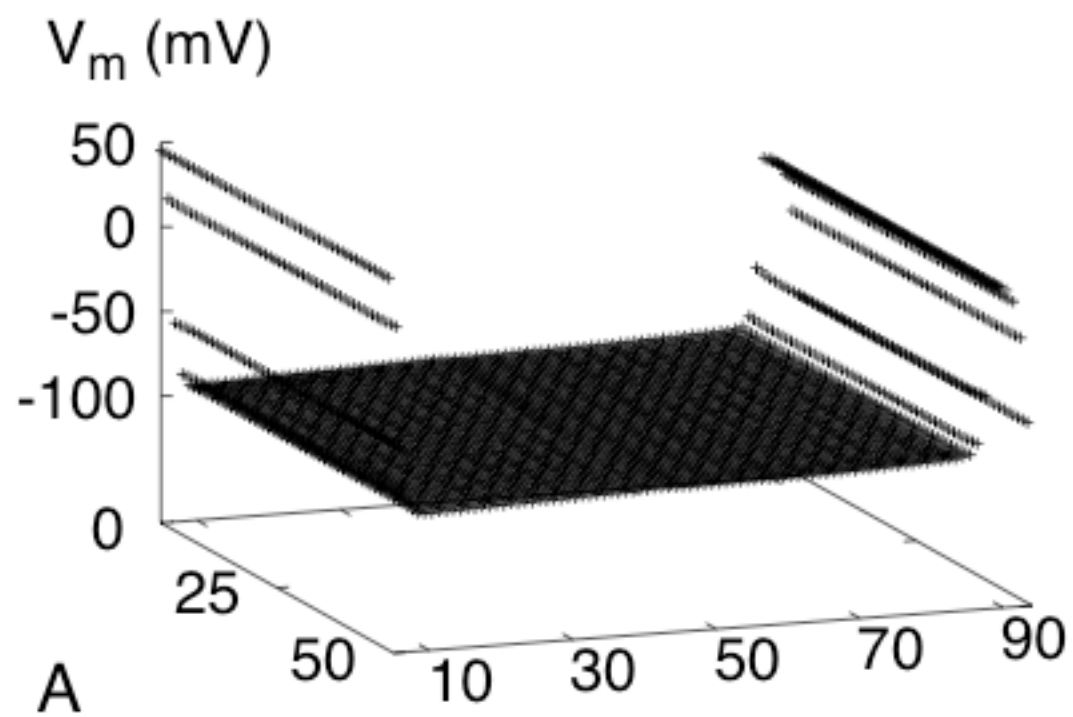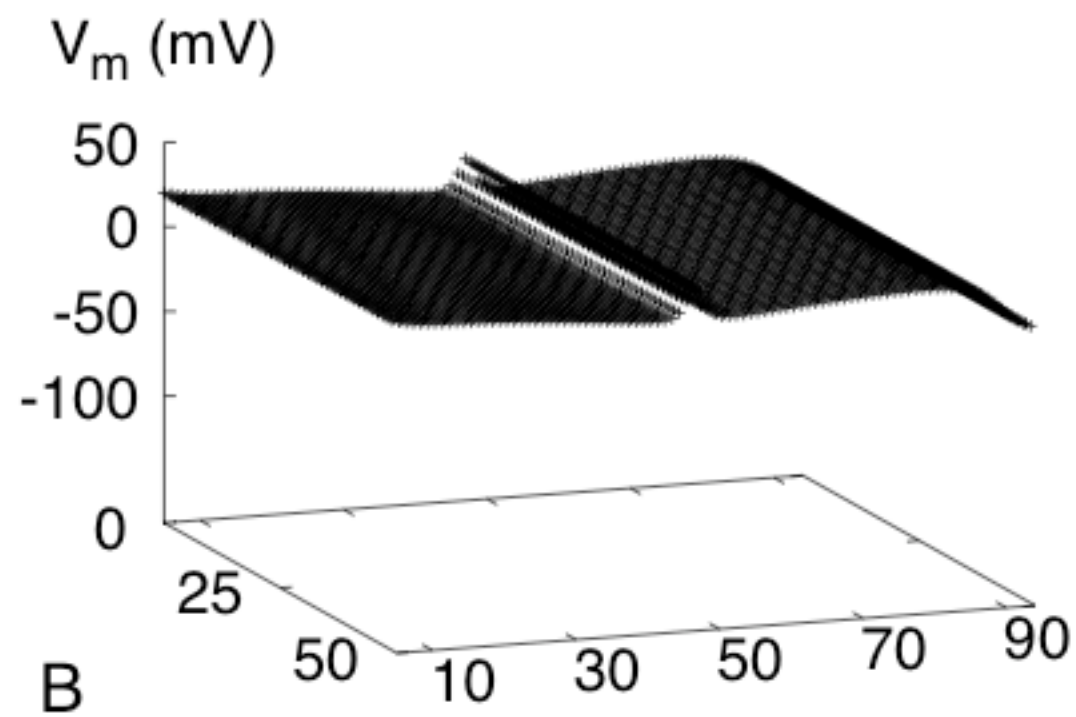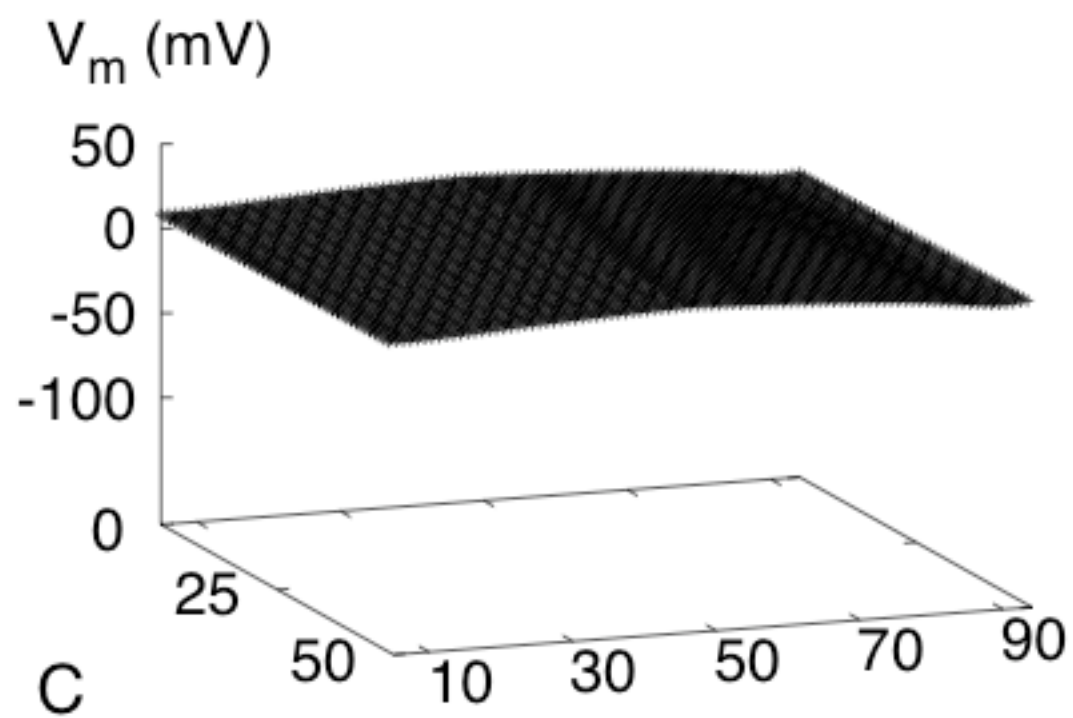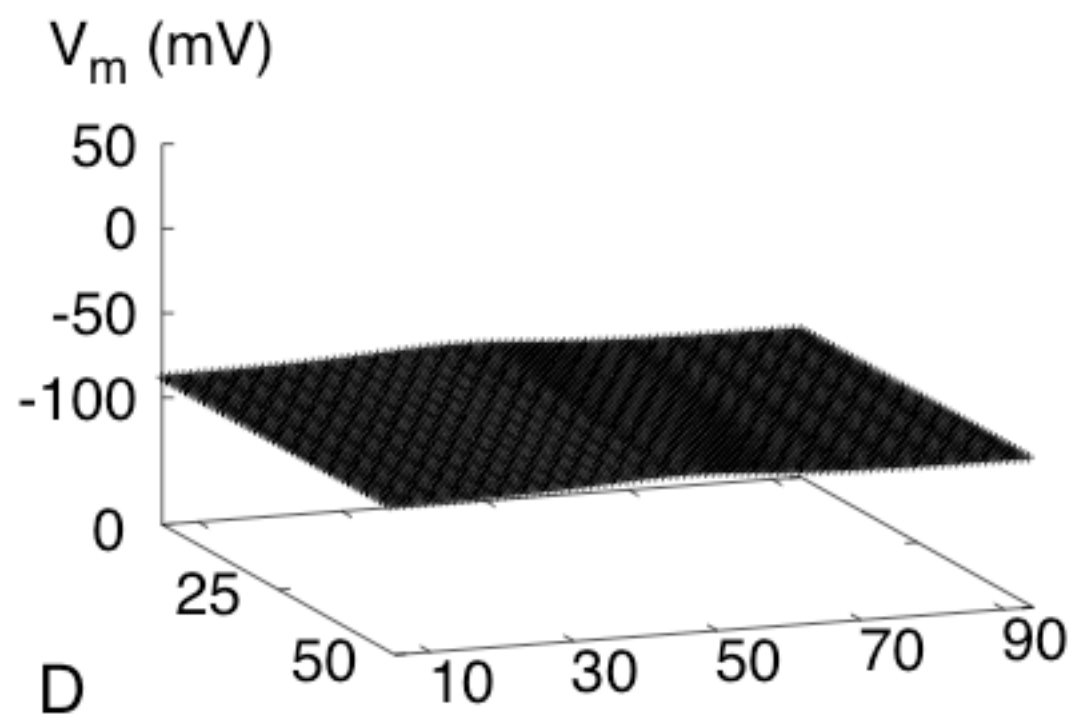

Supplement: MOESM8 [file 9430940]
